# Supplementary material
Source: bioRxiv or medRxiv preprint supplement (https://medrxiv.org/highwire/filestream/82366/field_highwire_adjunct_files/1/2020.05.21.20108936-2.pdf)

# All Deaths (Except COVID-19) Per 100,000 People

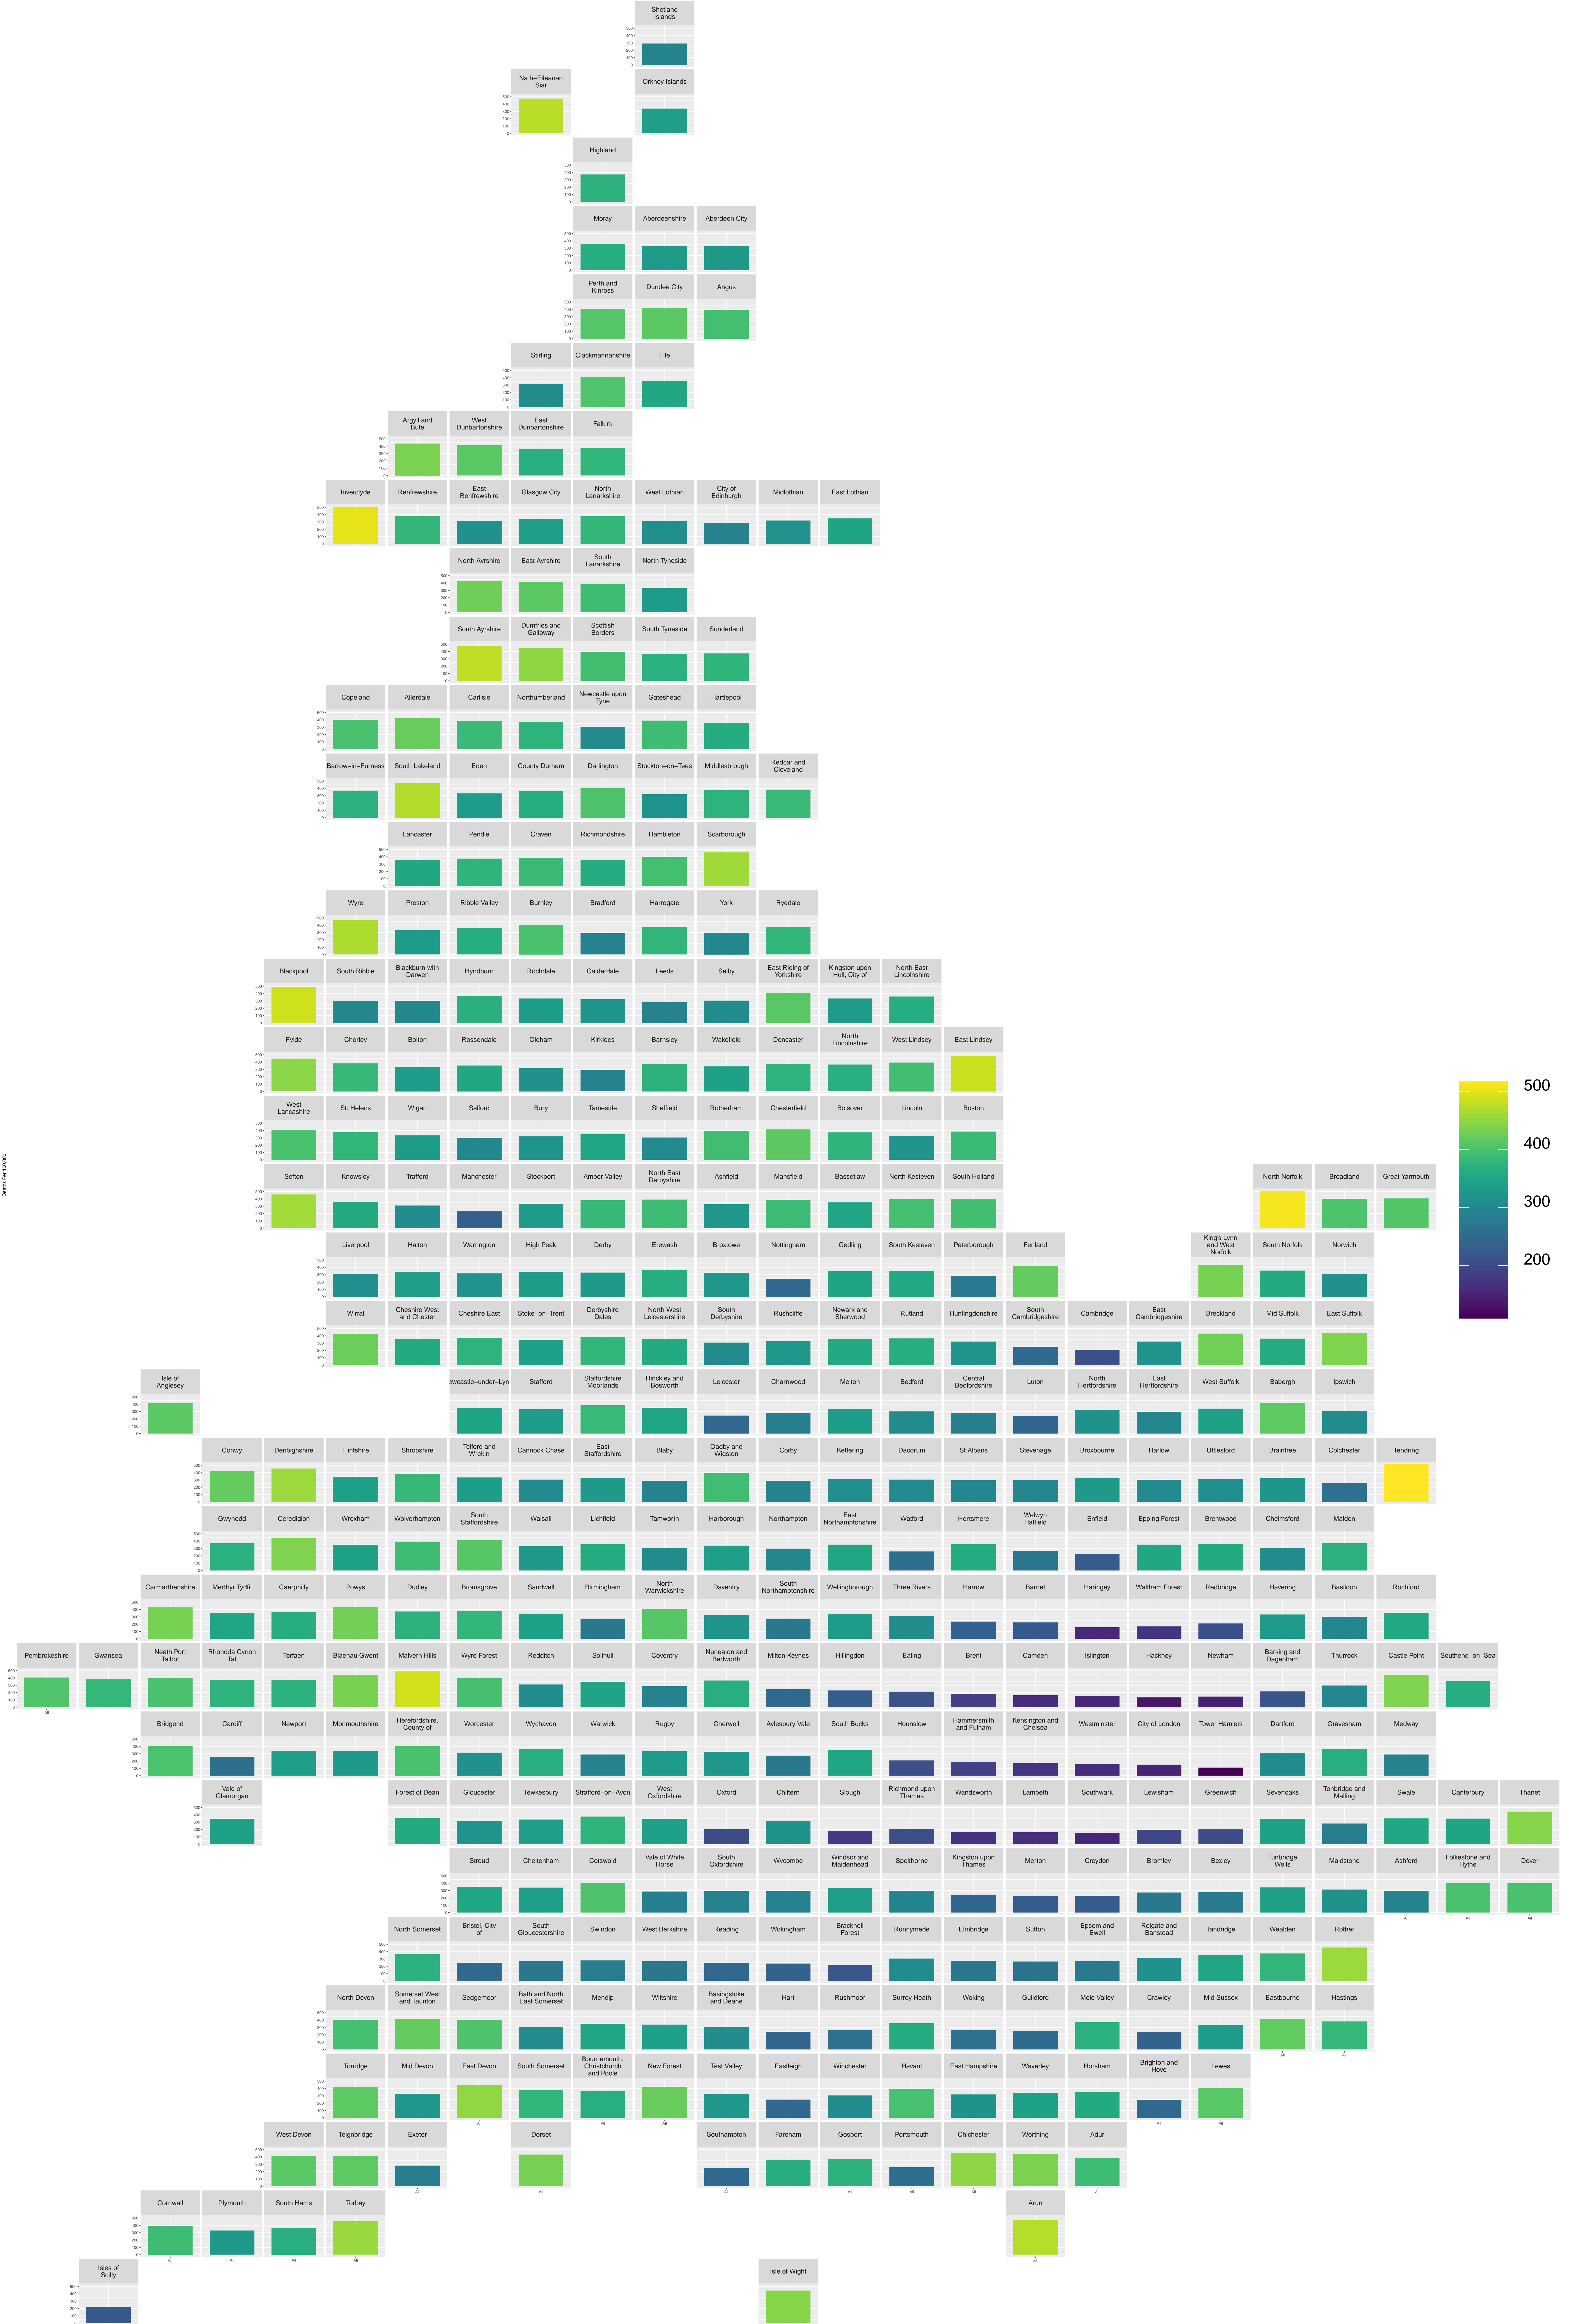

Supplement: Supplementary file [file 2020.05.21.20108936-2.pdf]
